# Supplementary material
Source: PubMed Central journal article supplement (PMC2929010)

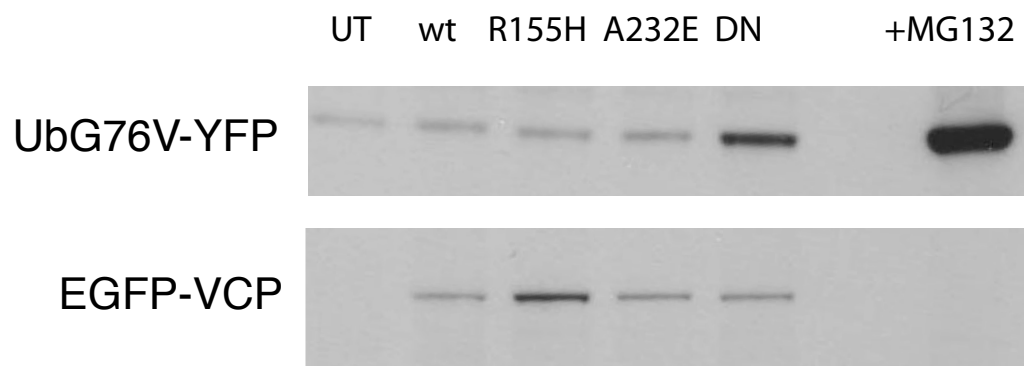

Supplementary figure 1

Supplement: NIHMS228922-supplement-Suppl_Fig_1.pdf [file NIHMS228922-supplement-Suppl_Fig_1.pdf]

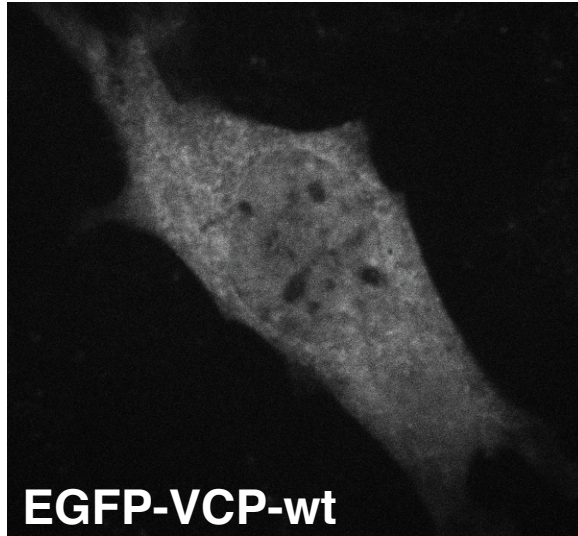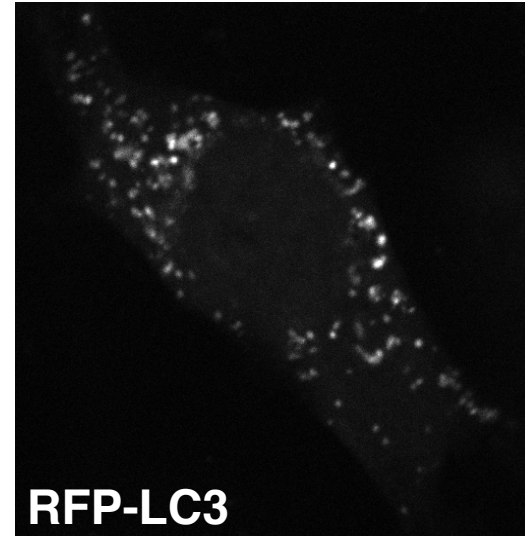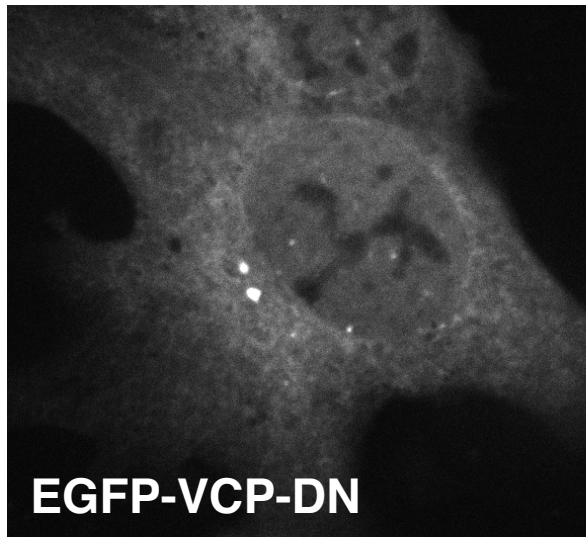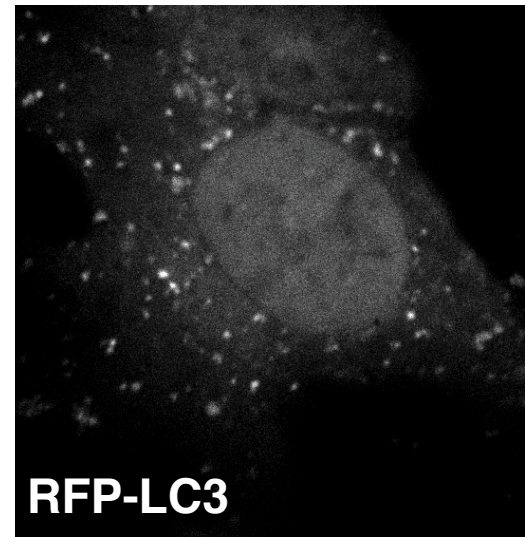

**Supplementary figure 2**

Supplement: NIHMS228922-supplement-Suppl_Fig_2.pdf [file NIHMS228922-supplement-Suppl_Fig_2.pdf]

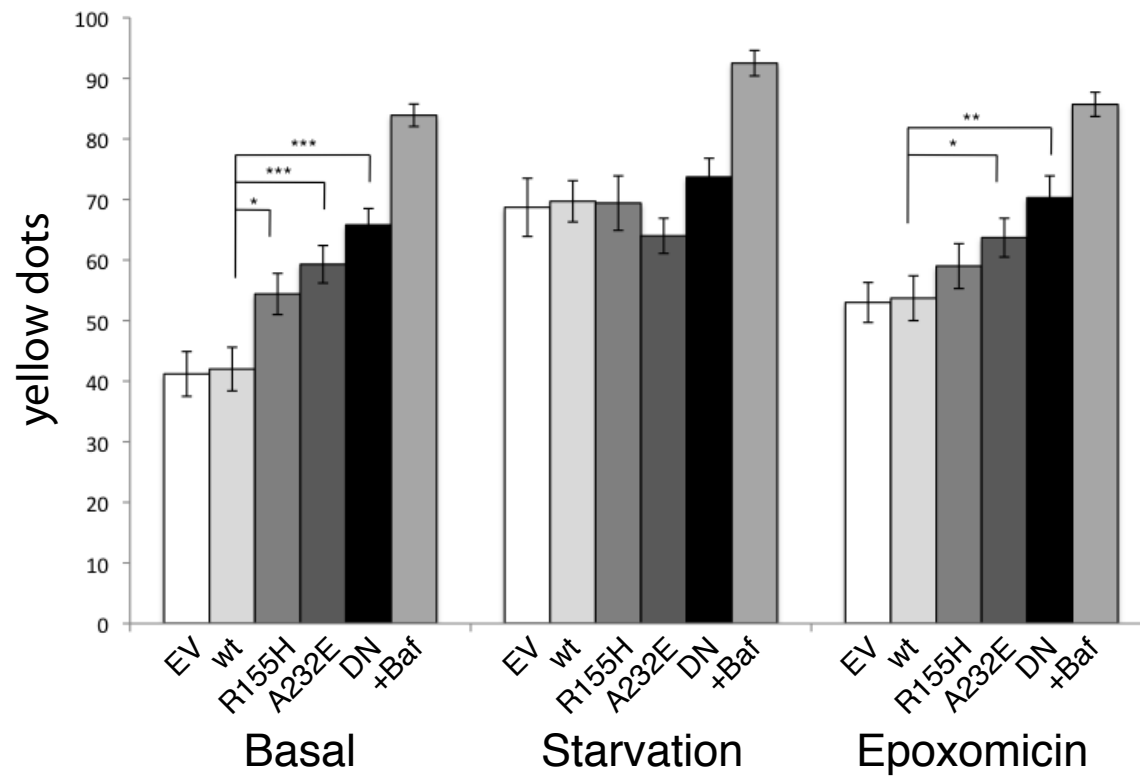

Supplementary figure 3

Supplement: NIHMS228922-supplement-Suppl_Fig_3.pdf [file NIHMS228922-supplement-Suppl_Fig_3.pdf]

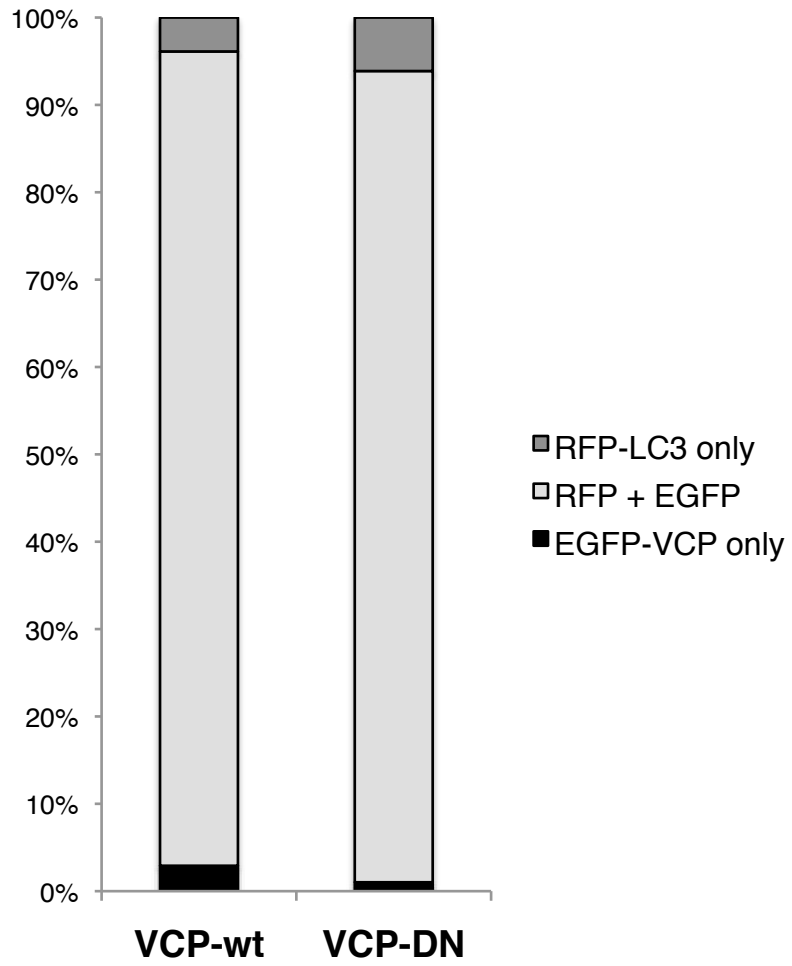

**Supplementary figure 4**

Supplement: NIHMS228922-supplement-Suppl_Fig_4.pdf [file NIHMS228922-supplement-Suppl_Fig_4.pdf]

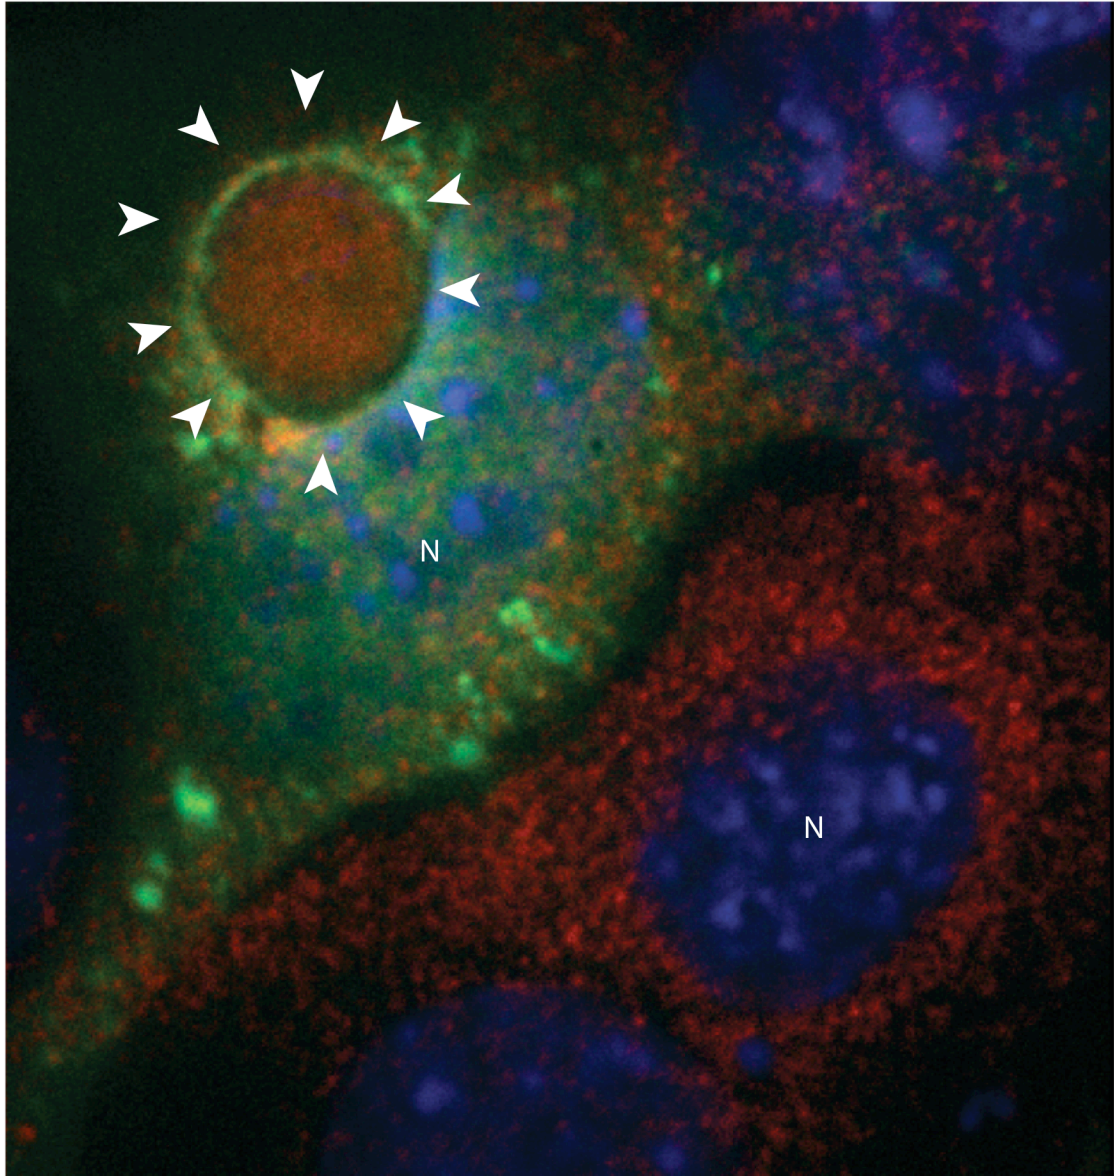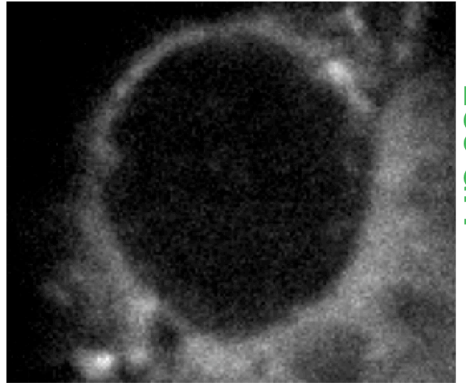

LC3 GFP

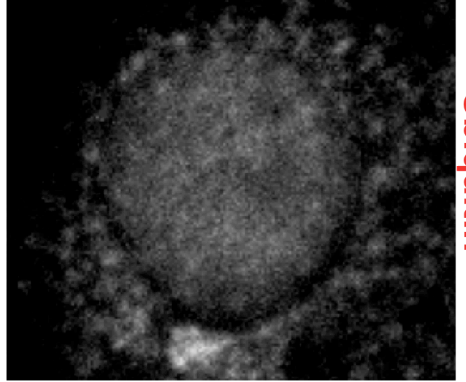

Ubiquitin

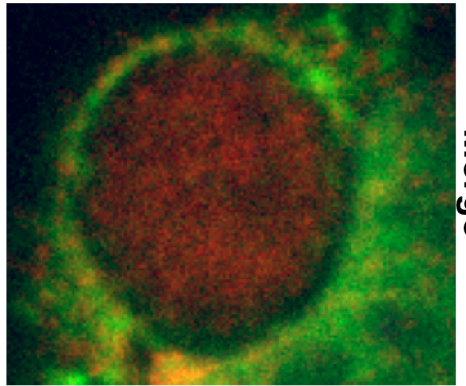

Merge

Supplementary figure 5

Supplement: NIHMS228922-supplement-Suppl_Fig_5.pdf [file NIHMS228922-supplement-Suppl_Fig_5.pdf]

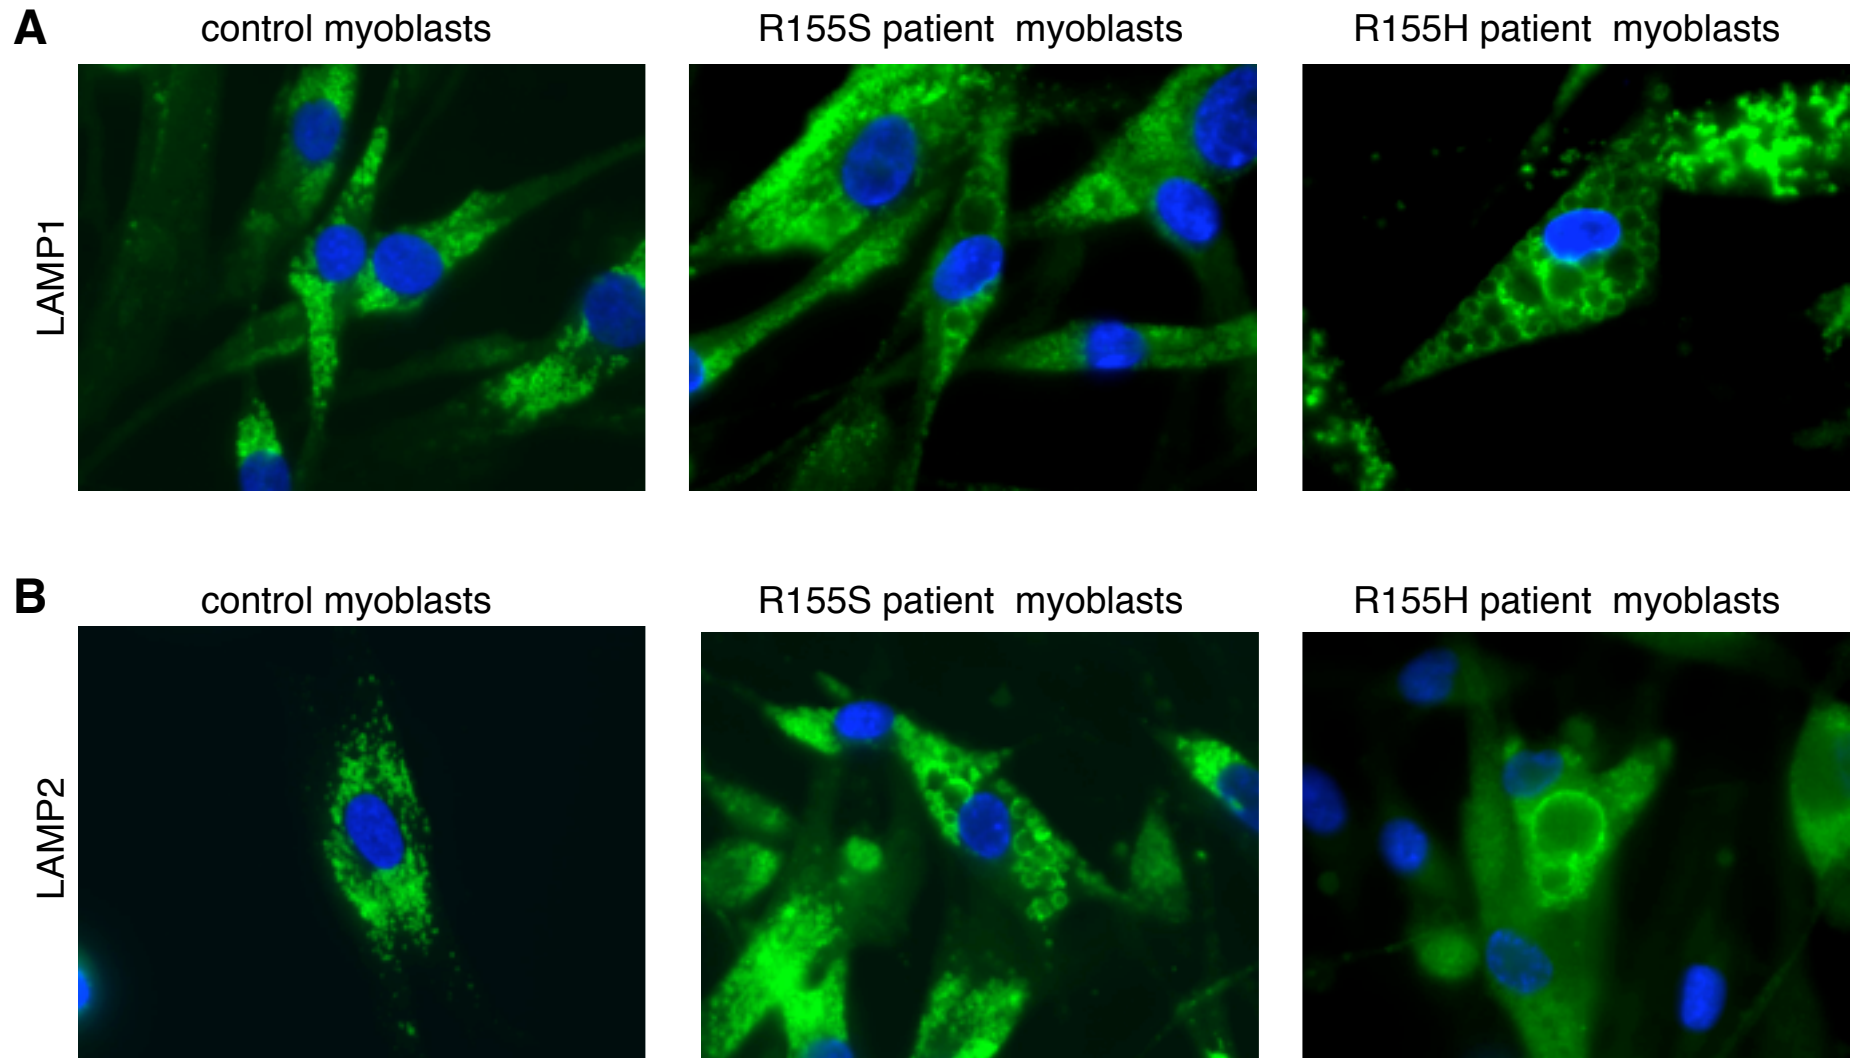

Supplement: NIHMS228922-supplement-Suppl_Fig_6.pdf [file NIHMS228922-supplement-Suppl_Fig_6.pdf]
